# Supplementary material
Source: MDPI journal article supplement (https://www.mdpi.com/2077-0472/13/5/967)
Supplement: s1 [file s1]

Supplementary Table S1. Items descriptive statistics

| Items       | Valid | Mean | Std.Devi<br>ation | Median (IQR) | Skewness | Kurtosis | Min-Max |
|-------------|-------|------|-------------------|--------------|----------|----------|---------|
| m12_FP      | 305   | 3,99 | 1,08              | 4(3-5)       | -0,91    | 0,11     | (1-5)   |
| m13_FP      | 305   | 4,09 | 0,96              | 4(4-5)       | -1,14    | 1,15     | (1-5)   |
| m14_FP      | 305   | 4,41 | 0,82              | 5(4-5)       | -1,68    | 3,12     | (1-5)   |
| m15_FP      | 305   | 4,41 | 0,80              | 5(4-5)       | -1,46    | 2,23     | (1-5)   |
| m32_ATB_FP  | 305   | 4,43 | 0,86              | 5(4-5)       | -2,10    | 5,11     | (1-5)   |
| m33_ATB_FP  | 305   | 4,41 | 0,78              | 5(4-5)       | -2,05    | 6,14     | (1-5)   |
| m34_SN_FP   | 305   | 3,91 | 1,01              | 4(3-5)       | -0,87    | 0,41     | (1-5)   |
| m35_SN_FP   | 305   | 3,90 | 0,93              | 4(3-5)       | -0,73    | 0,10     | (1-5)   |
| m36_PBC_FP  | 305   | 4,29 | 0,76              | 4(4-5)       | -1,71    | 4,99     | (1-5)   |
| m37_PBC_FP  | 305   | 4,17 | 0,98              | 4(4-5)       | -1,42    | 1,74     | (1-5)   |
| m38_BI_FP   | 305   | 4,47 | 0,66              | 5(4-5)       | -1,49    | 3,68     | (1-5)   |
| m39_BI_FP   | 305   | 4,51 | 0,69              | 5(4-5)       | -2,04    | 6,53     | (1-5)   |
| m17_MH      | 252   | 3,83 | 1,29              | 4(3-5)       | -0,96    | -0,17    | (1-5)   |
| m18_MH      | 252   | 4,07 | 1,01              | 4(4-5)       | -1,00    | 0,34     | (1-5)   |
| m19_MH      | 252   | 2,41 | 1,40              | 2(1-3)       | 0,57     | -0,99    | (1-5)   |
| m20_MH      | 252   | 3,68 | 1,24              | 4(3-5)       | -0,73    | -0,47    | (1-5)   |
| m41_ATB_MH  | 251   | 4,00 | 1,19              | 4(4-5)       | -1,36    | 1,00     | (1-5)   |
| m42_ATB_MH  | 251   | 4,32 | 0,73              | 4(4-5)       | -1,21    | 2,29     | (1-5)   |
| m43_SN_MH   | 251   | 3,84 | 0,93              | 4(3-4)       | -0,71    | 0,13     | (1-5)   |
| m44_SN_MH   | 251   | 3,94 | 0,99              | 4(4-5)       | -0,78    | -0,23    | (1-5)   |
| m45_PBC_MH  | 251   | 4,28 | 0,93              | 4(4-5)       | -1,60    | 2,66     | (1-5)   |
| m46_PBC_MH  | 251   | 3,14 | 1,39              | 3(2-4)       | -0,11    | -1,31    | (1-5)   |
| m47_BI_MH   | 251   | 4,32 | 0,90              | 5(4-5)       | -1,69    | 3,26     | (1-5)   |
| m48_BI_MH   | 251   | 4,45 | 0,72              | 5(4-5)       | -1,65    | 4,18     | (1-5)   |
| m22_CPH     | 257   | 3,97 | 1,12              | 4(3-5)       | -1,00    | 0,16     | (1-5)   |
| m23_CPH     | 257   | 4,21 | 1,05              | 5(4-5)       | -1,34    | 1,01     | (1-5)   |
| m24_CPH     | 257   | 2,90 | 1,49              | 3(2-4)       | 0,16     | -1,39    | (1-5)   |
| m25_CPH     | 257   | 4,46 | 0,76              | 5(4-5)       | -1,68    | 3,58     | (1-5)   |
| m26_CPH     | 257   | 3,85 | 1,30              | 4(3-5)       | -0,85    | -0,55    | (1-5)   |
| m60_ATB_CPH | 258   | 4,35 | 0,75              | 4(4-5)       | -1,30    | 2,30     | (1-5)   |
| m61_ATB_CPH | 258   | 3,96 | 0,94              | 4(3-5)       | -0,84    | 0,43     | (1-5)   |
| m62_ATB_CPH | 258   | 4,54 | 0,62              | 5(4-5)       | -1,33    | 1,99     | (2-5)   |
| m63_SN_CPH  | 258   | 3,99 | 0,98              | 4(3-5)       | -0,72    | -0,18    | (1-5)   |
| m64_SN_CPH  | 258   | 4,10 | 1,00              | 4(4-5)       | -1,03    | 0,50     | (1-5)   |
| m65_SN_CPH  | 258   | 3,99 | 1,03              | 4(3-5)       | -0,82    | -0,21    | (1-5)   |
| m66_PBC_CPH | 258   | 4,38 | 0,73              | 5(4-5)       | -1,22    | 1,93     | (1-5)   |
| m67_PBC_CPH | 258   | 4,41 | 0,71              | 5(4-5)       | -1,45    | 3,61     | (1-5)   |
| m68_BI_CPH  | 258   | 4,43 | 0,67              | 4(4-5)       | -1,79    | 6,67     | (1-5)   |
| m69_BI_CPH  | 258   | 4,41 | 0,69              | 4,5(4-5)     | -1,18    | 1,77     | (2-5)   |

| Items      | Valid | Mean | Std.Devi |  | Median (IQR) | Skewness | Kurtosis | Min-Max |
|------------|-------|------|----------|--|--------------|----------|----------|---------|
|            |       |      | ation    |  |              |          |          |         |
| m28_AH     | 192   | 4,01 | 1,35     |  | 5(4-5)       | -1,23    | 0,20     | (1-5)   |
| m29_AH     | 192   | 4,14 | 1,02     |  | 4(4-5)       | -1,26    | 1,24     | (1-5)   |
| m30_AH     | 192   | 4,51 | 0,68     |  | 5(4-5)       | -1,44    | 2,29     | (2-5)   |
| m31_AH     | 192   | 4,14 | 1,15     |  | 5(4-5)       | -1,26    | 0,67     | (1-5)   |
| m50_ATB_AH | 222   | 4,15 | 0,88     |  | 4(4-5)       | -1,49    | 2,84     | (1-5)   |
| m51_ATB_AH | 222   | 4,58 | 0,53     |  | 5(4-5)       | -0,68    | -0,78    | (3-5)   |
| m52_ATB_AH | 222   | 4,56 | 0,57     |  | 5(4-5)       | -1,16    | 2,05     | (2-5)   |
| m53_SN_AH  | 222   | 3,75 | 1,02     |  | 4(3-5)       | -0,58    | -0,24    | (1-5)   |
| m54_SN_AH  | 222   | 3,84 | 0,99     |  | 4(3-5)       | -0,52    | -0,51    | (1-5)   |
| m55_PBC_AH | 222   | 4,18 | 1,03     |  | 4(4-5)       | -1,64    | 2,56     | (1-5)   |
| m56_PBC_AH | 222   | 2,55 | 1,36     |  | 2(2-4)       | 0,61     | -0,97    | (1-5)   |
| m57_BI_AH  | 222   | 4,43 | 0,80     |  | 5(4-5)       | -2,07    | 5,74     | (1-5)   |
| m58_BI_AH  | 222   | 4,53 | 0,58     |  | 5(4-5)       | -1,09    | 1,66     | (2-5)   |
| m70_SC     | 305   | 3,65 | 1,08     |  | 4(3-4)       | -0,69    | -0,20    | (1-5)   |
| m71_SC     | 305   | 3,09 | 1,36     |  | 3(2-4)       | -0,03    | -1,29    | (1-5)   |
| m72_SC     | 305   | 3,07 | 1,34     |  | 3(2-4)       | -0,04    | -1,19    | (1-5)   |
| m73_SC     | 305   | 2,28 | 1,36     |  | 2(1-3)       | 0,63     | -0,94    | (1-5)   |
| m74_SC     | 305   | 2,08 | 1,21     |  | 2(1-3)       | 0,96     | -0,03    | (1-5)   |
| m75_B      | 305   | 3,72 | 1,14     |  | 4(3-5)       | -0,54    | -0,47    | (1-5)   |
| m76_B      | 305   | 3,41 | 1,39     |  | 4(2-5)       | -0,31    | -1,26    | (1-5)   |
| m77_B      | 305   | 3,72 | 1,23     |  | 4(3-5)       | -0,86    | -0,15    | (1-5)   |
| m78_B      | 302   | 3,51 | 1,26     |  | 4(3-4)       | -0,62    | -0,64    | (1-5)   |
| m79_B      | 305   | 4,05 | 1,28     |  | 5(4-5)       | -1,28    | 0,44     | (1-5)   |
| m80_B      | 305   | 3,74 | 1,18     |  | 4(3-5)       | -0,81    | -0,18    | (1-5)   |
| m81_B      | 305   | 3,97 | 1,19     |  | 4(3-5)       | -0,93    | -0,13    | (1-5)   |

Supplementary Table S2. Cronbach's Alpha scores, item-total correlations

| Item                                        | If item deleted<br>Cronbach's $\alpha$ | Item-total<br>correlation |
|---------------------------------------------|----------------------------------------|---------------------------|
| <b>Fall Prevention=0.843</b>                |                                        |                           |
| m12_FP                                      | 0.831                                  | 0.522                     |
| m13_FP                                      | 0.831                                  | 0.519                     |
| m14_FP                                      | 0.832                                  | 0.494                     |
| m15_FP                                      | 0.832                                  | 0.494                     |
| m32_ATB_FP                                  | 0.821                                  | 0.650                     |
| m33_ATB_FP                                  | 0.826                                  | 0.584                     |
| m34_SN_FP                                   | 0.832                                  | 0.507                     |
| m35_SN_FP                                   | 0.832                                  | 0.496                     |
| m36_PBC_FP                                  | 0.836                                  | 0.442                     |
| m37_PBC_FP                                  | 0.832                                  | 0.500                     |
| m38_BI_FP                                   | 0.834                                  | 0.488                     |
| m39_BI_FP                                   | 0.835                                  | 0.453                     |
| <b>Machine Handling=0.688</b>               |                                        |                           |
| m17_MH                                      | 0.650                                  | 0.429                     |
| m18_MH                                      | 0.660                                  | 0.385                     |
| m19_MH                                      | <b>0.732</b>                           | <b>0.010</b>              |
| m20_MH                                      | 0.660                                  | 0.375                     |
| m41_ATB_MH                                  | 0.639                                  | 0.495                     |
| m42_ATB_MH                                  | 0.651                                  | 0.529                     |
| m43_SN_MH                                   | 0.653                                  | 0.450                     |
| m44_SN_MH                                   | 0.652                                  | 0.437                     |
| m45_PBC_MH                                  | 0.679                                  | 0.256                     |
| m46_PBC_MH                                  | <b>0.711</b>                           | <b>0.120</b>              |
| m47_BI_MH                                   | 0.662                                  | 0.383                     |
| m48_BI_MH                                   | 0.670                                  | 0.340                     |
| <b>Chemical-Pestisid<br/>Handling=0.888</b> |                                        |                           |
| m22_CPH                                     | 0.876                                  | 0.643                     |
| m23_CPH                                     | 0.880                                  | 0.570                     |
| m24_CPH                                     | 0.889                                  | 0.503                     |
| m25_CPH                                     | 0.879                                  | 0.599                     |
| m26_CPH                                     | 0.888                                  | 0.463                     |
| m60_ATB_CPH                                 | 0.879                                  | 0.625                     |
| m61_ATB_CPH                                 | 0.882                                  | 0.535                     |
| m62_ATB_CPH                                 | 0.881                                  | 0.601                     |

| Item                         | If item deleted<br>Cronbach's $\alpha$ | Item-total<br>correlation |
|------------------------------|----------------------------------------|---------------------------|
| m63_SN_CPH                   | 0.879                                  | 0.591                     |
| m64_SN_CPH                   | 0.881                                  | 0.560                     |
| m65_SN_CPH                   | 0.876                                  | 0.661                     |
| m66_PBC_CPH                  | 0.878                                  | 0.661                     |
| m67_PBC_CPH                  | 0.881                                  | 0.573                     |
| m68_BI_CPH                   | 0.882                                  | 0.557                     |
| m69_BI_CPH                   | 0.883                                  | 0.529                     |
| <b>Animal Handling=0.716</b> |                                        |                           |
| m28_AH                       | 0.700                                  | 0.350                     |
| m29_AH                       | 0.691                                  | 0.392                     |
| m30_AH                       | 0.702                                  | 0.329                     |
| m31_AH                       | 0.688                                  | 0.408                     |
| m50_ATB_AH                   | 0.676                                  | 0.520                     |
| m51_ATB_AH                   | 0.702                                  | 0.361                     |
| m52_ATB_AH                   | 0.697                                  | 0.413                     |
| m53_SN_AH                    | 0.680                                  | 0.481                     |
| m54_SN_AH                    | 0.680                                  | 0.486                     |
| m55_PBC_AH                   | 0.715                                  | 0.211                     |
| m56_PBC_AH                   | <b>0.776</b>                           | <b>-0.096</b>             |
| m57_BI_AH                    | 0.687                                  | 0.466                     |
| m58_BI_AH                    | 0.686                                  | 0.576                     |
| <b>Safety Culture=0.777</b>  |                                        |                           |
| m70_SC                       | 0.799                                  | 0.325                     |
| m71_SC                       | 0.683                                  | 0.692                     |
| m72_SC                       | 0.684                                  | 0.693                     |
| m73_SC                       | 0.738                                  | 0.545                     |
| m74_SC                       | 0.750                                  | 0.505                     |
| <b>Barriers=0.799</b>        |                                        |                           |
| m75_B                        | 0.777                                  | 0.506                     |
| m76_B                        | 0.781                                  | 0.495                     |
| m77_B                        | 0.746                                  | 0.674                     |
| m78_B                        | 0.752                                  | 0.637                     |
| m79_B                        | 0.774                                  | 0.523                     |
| m80_B                        | 0.753                                  | 0.644                     |
| m81_B                        | <b>0.819</b>                           | 0.254                     |

Supplementary Table S3. SEM Analyses: Direct and indirect effect of the determinants of the TPB on safety behavior

| <b>Fall Prevention Dimension</b>             |             |                         |             |
|----------------------------------------------|-------------|-------------------------|-------------|
| <b>Direct effects</b>                        | <b>Beta</b> | <b>Indirect effects</b> | <b>Beta</b> |
| ATB → BI                                     | 0.35***     | ATB → Behavior          | 0.07**      |
| SN → BI                                      | 0.01        | SN → Behavior           | -0.01       |
| PBC → BI                                     | 0.32***     | PBC → Behavior          | 0.06**      |
| BI → Behavior                                | 0.19***     |                         |             |
| SC → Behavior                                | 0.27***     |                         |             |
| B → Behavior                                 | 0.11*       |                         |             |
| <b>Machine Handling Dimension</b>            |             |                         |             |
| <b>Direct effects</b>                        | <b>Beta</b> | <b>Indirect effects</b> | <b>Beta</b> |
| ATB → BI                                     | 0.56***     | ATB → Behavior          | 0.09**      |
| SN → BI                                      | 0.04        | SN → Behavior           | 0.01        |
| PBC → BI                                     | -0.02       | PBC → Behavior          | -0.01       |
| BI → Behavior                                | 0.16**      |                         |             |
| SC → Behavior                                | 0.29***     |                         |             |
| B → Behavior                                 | 0.14*       |                         |             |
| <b>Chemical Pesticide Handling Dimension</b> |             |                         |             |
| <b>Direct effects</b>                        | <b>Beta</b> | <b>Indirect effects</b> | <b>Beta</b> |
| ATB → BI                                     | -0.01       | ATB → Behavior          | -0.01       |
| SN → BI                                      | 0.17**      | SN → Behavior           | 0.06**      |
| PBC → BI                                     | 0.59***     | PBC → Behavior          | 0.21***     |
| BI → Behavior                                | 0.36***     |                         |             |
| SC → Behavior                                | 0.26***     |                         |             |
| B → Behavior                                 | 0.06        |                         |             |
| <b>Animal Handling Dimension</b>             |             |                         |             |
| <b>Direct effects</b>                        | <b>Beta</b> | <b>Indirect effects</b> | <b>Beta</b> |
| ATB → BI                                     | 0.66***     | ATB → Behavior          | 0.17***     |
| SN → BI                                      | 0.03        | SN → Behavior           | 0.01        |
| PBC → BI                                     | 0.08        | PBC → Behavior          | 0.02        |
| BI → Behavior                                | 0.25***     |                         |             |
| SC → Behavior                                | 0.29***     |                         |             |
| B → Behavior                                 | 0.07        |                         |             |

Beta: Standardized Coefficient \* p&lt;0.05 \*\*p&lt;0.01 \*\*\*p&lt;0.001;

FP: Fall Prevention; MH: Machine Handling; CPH: Chemical and Pesticide Handling; AH: Animal Handling; ATB: Attitudes Toward Behavior; SN: Social Norms; PBC: Perceived Behavior Control; BI: Behavior Intention; SC: Safety Culture; B: Barriers
